# Supplementary material for: A social cost-benefit analysis of two One Health interventions to prevent toxoplasmosis
Source: PubMed Central journal article supplement (PMC6510435; doi:10.1371/journal.pone.0216615), 2019-05-10

S2 Fig

Assuming effectiveness 1%, lasting for 5 years in the maximum scenario

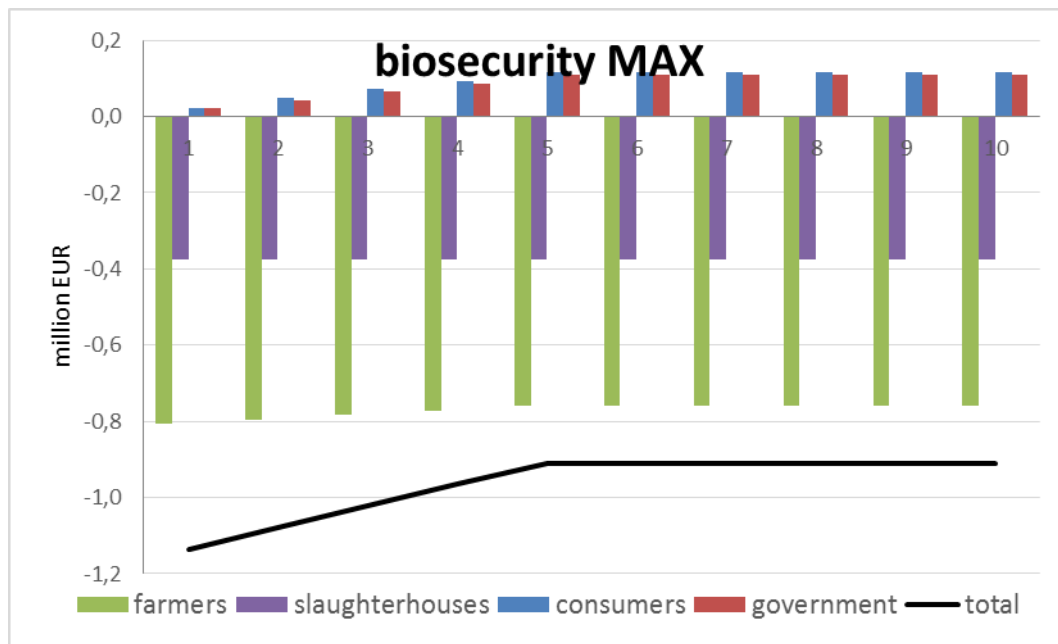

Supplement: pone.0216615.s009.pdf [file pone.0216615.s009.pdf]
